# Supplementary material for: Comparative Study of One-Step Cross-Linked Electrospun Chitosan-Based Membranes
Source: Hindawi journal article supplement (doi:10.1155/2017/1980714), 2017-01-01
Supplement: f1 [file 1980714.f1.docx]

Supporting Information

Comparative Study of One-Step Crosslinked Electrospun Chitosan-Based Membranes

Yanet Elised Aguirre-Chagala, Laura B. Pavón-Pérez, Víctor M. Altuzar-Aguilar, Jorge G. Domínguez-Chávez, Severino Muñoz-Aguirre and Claudia Mendoza-Barrera*

*Figure S1.* Calibration curve obtained at 570 nm with HMDA solutions at 0.005-0.2 mM range concentrations, analyzed by ninhydrin in water/isopropanol (3:1 v/v).

*Figure S2.* Behavior of the irradiation emitted by the UVA lamp (Steren, 6 watts) in the 315-400 nm range.

*Table A.1* Analysis of the energy emitted by the UVA lamp (Steren, 6 watts).

| **Distance [cm]** | **Power [mW]** | **power/area [mW/cm2]** |
| --- | --- | --- |
| 0 | 0.425 | 0.557648377 |
| 5 | 0.104 | 0.136459838 |
| 10 | 0.058 | 0.076102602 |
| 15 | 0.0348 | 0.045661561 |
| 20 | 0.0229 | 0.030047407 |
| 25 | 0.0162 | 0.021256244 |
| 30 | 0.0123 | 0.016139 |


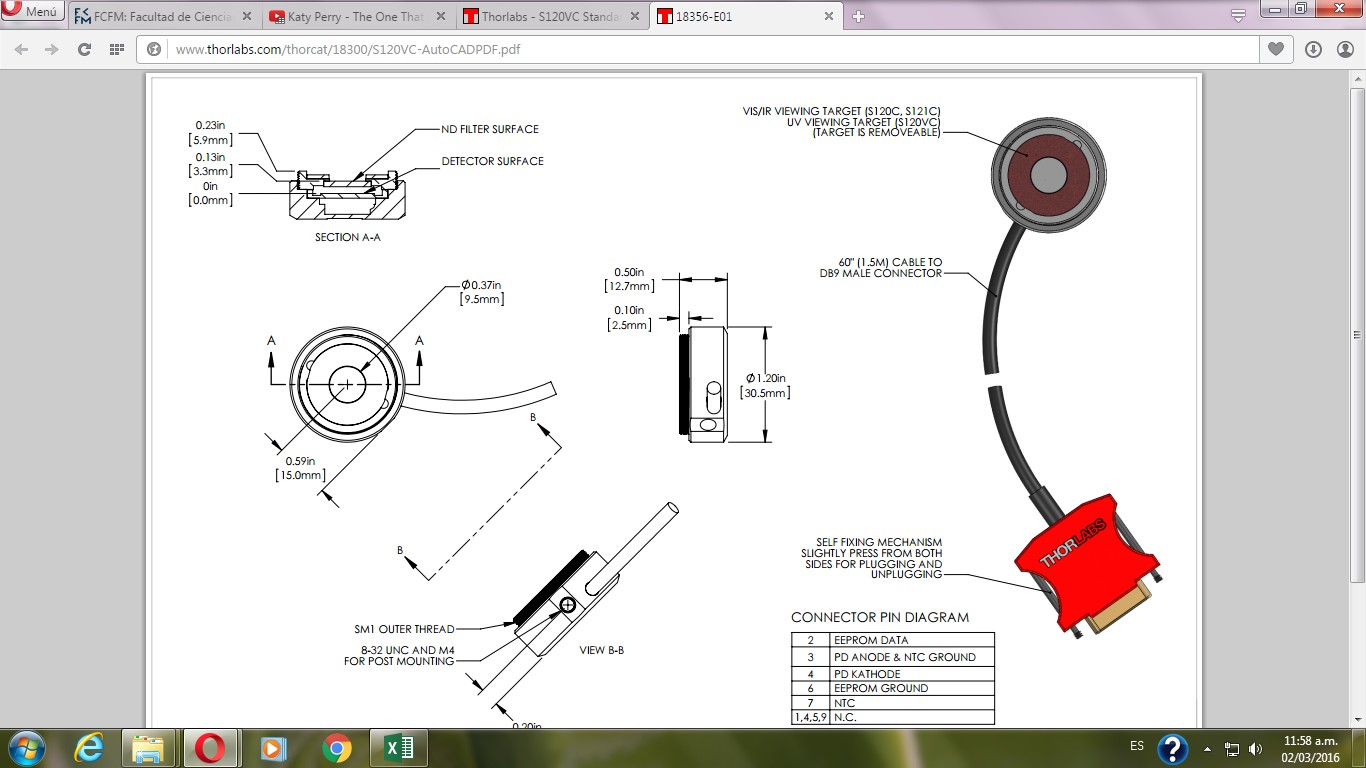

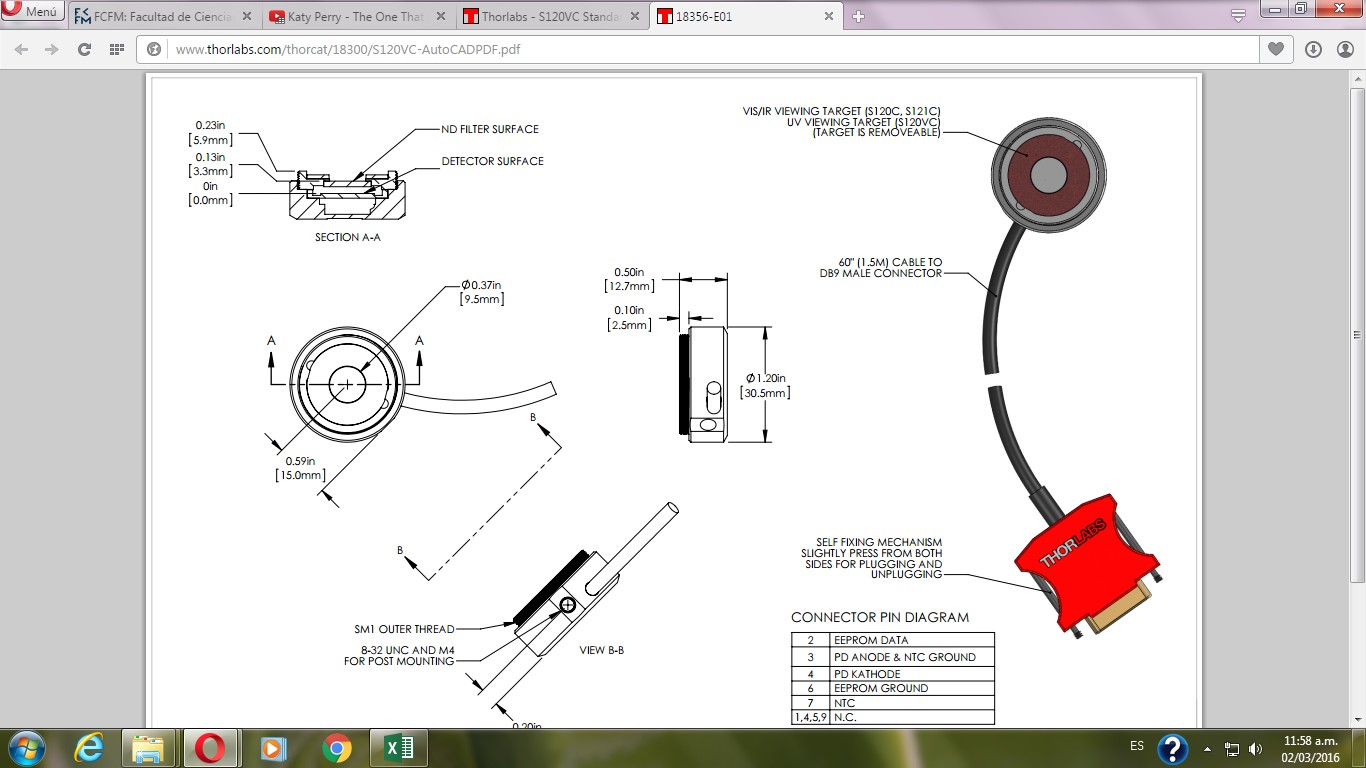

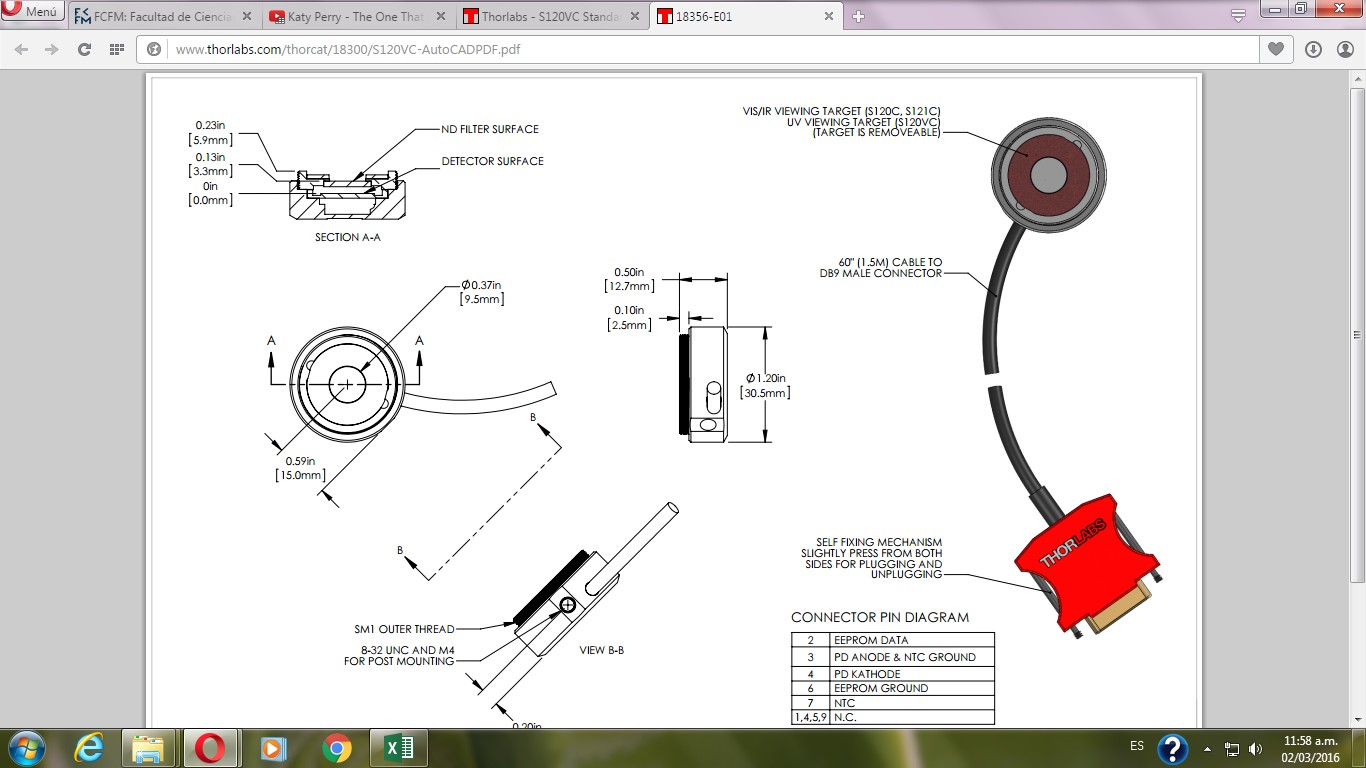


**a)**

**b)**

**c)**

*Figure S3.* Sensor (S120VC) structure utilized for analysis of UVA lamp, with a 50 mW power. A) Top view, B) inclined top view: Ø=30.5 mm×12.7 mm, C) side view.

*Figure S4.* Power behavior detected at different distances. The two lamps were placed in the 0.1-0.4 mW range.

*Figure S5.*Thermogram of PEO and CH pure, determined by DSC.

*Figure S6.*TGA and DTGA of: (A) PEO and (B) chitosan.

*Figure S7.* UV-vis spectroscopy by ninhydrin method to estimate the experimental crosslinking degree.
